# Supplementary material for: Mitochondrial membrane-based initial separation of MIWI and MILI functions during pachytene piRNA biogenesis
Source: PubMed Central journal article supplement (PMC6411938; doi:10.1093/nar/gky1281), 2018-12-22
Supplement: gky1281_supplemental_files.pdf [file gky1281_supplemental_files.pdf]

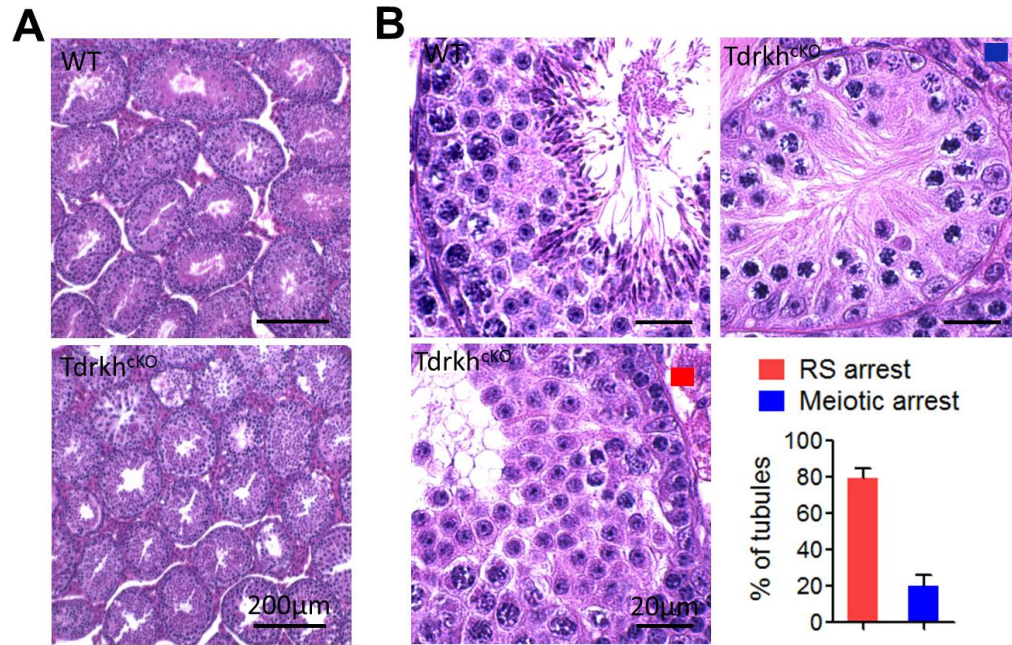

**Figure S1. TDRKH deficiency in postnatal male germ cells causes spermatogenic arrest.**

(A) Hematoxylin and eosin stained testis sections from adult WT and *Tdrkh*<sup>CKO</sup> mice are shown. Scale bars, 200 $\mu$ m. (B) Different arrest stages observed in *Tdrkh*<sup>CKO</sup> testes. Scale bars, 20 $\mu$ m. The percentage of round spermatid arrest and meiotic arrest seminiferous tubules in *Tdrkh*<sup>CKO</sup> testes are shown. Error bars represent s.e.m. n=4.

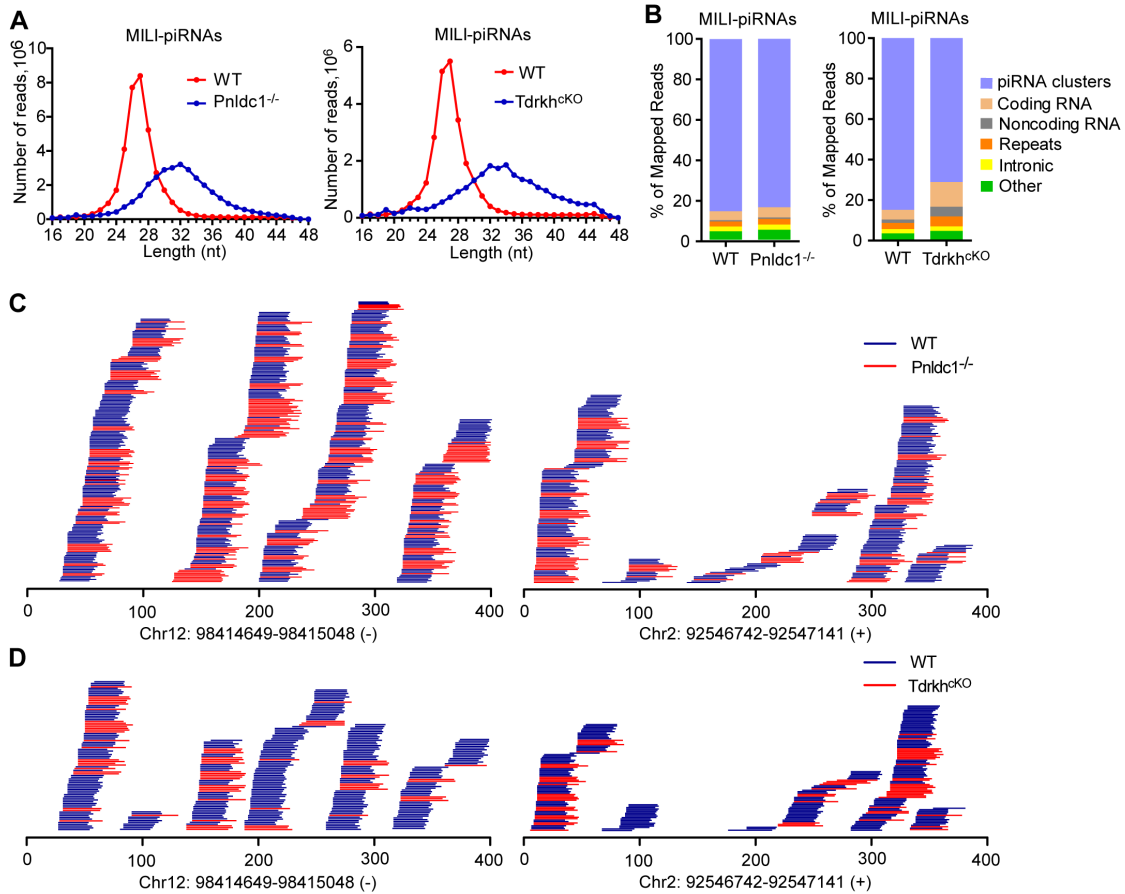

**Figure S2. The 3' end extension of MILI-piRNAs in adult *Tdrkh*<sup>CKO</sup> and *Pnlcd1*<sup>-/-</sup> testes.**

(A) The length distribution of MILI-piRNAs from adult WT, *Tdrkh*<sup>CKO</sup> and *Pnlcd1*<sup>-/-</sup> MILI-piRNA libraries. (B) Genomic annotation of MILI-piRNAs from adult WT, *Tdrkh*<sup>CKO</sup> and *Pnlcd1*<sup>-/-</sup> testes. Sequence reads (24-48 nt) from MILI-piRNAs libraries were aligned to mouse genomic sequence sets in the following order: piRNA clusters, coding RNA, non-coding RNA, repeats, intronic sequences and other. The percentage of mapped reads is shown. (C) Extended piRNA 3' ends in *Pnlcd1*<sup>-/-</sup> testes. Alignments between 33-48 nt reads from *Pnlcd1*<sup>-/-</sup> MILI-piRNA library and 24-32 nt reads from WT MILI-piRNA library within a selected regions from two representative piRNA clusters. The genomic locations of the piRNA clusters are shown at the bottom. (D) Extended piRNA 3' ends in *Tdrkh*<sup>CKO</sup> testes. Alignments between 31-48 nt reads from *Tdrkh*<sup>CKO</sup> MILI-piRNA library and 24-30 nt reads from WT MILI-piRNA library within a selected regions from two representative piRNA clusters. The genomic locations of the piRNA clusters are shown at the bottom.

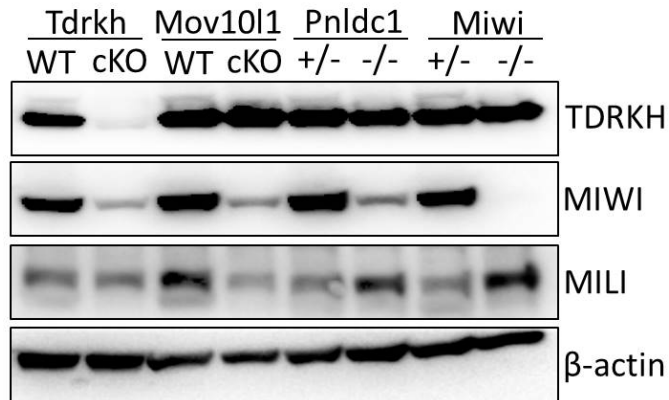

**Figure S3. Protein expression of TDRKH, MILI and MIWI in *Tdrkh*<sup>cKO</sup>, *Mov10l1*<sup>cKO</sup>, *Pnlcd1*<sup>-/-</sup> and *Miwi*<sup>-/-</sup> mice.** Western blotting showing the expression of TDRKH, MILI and MIWI in testes from indicated mice. β-actin served as a loading control.

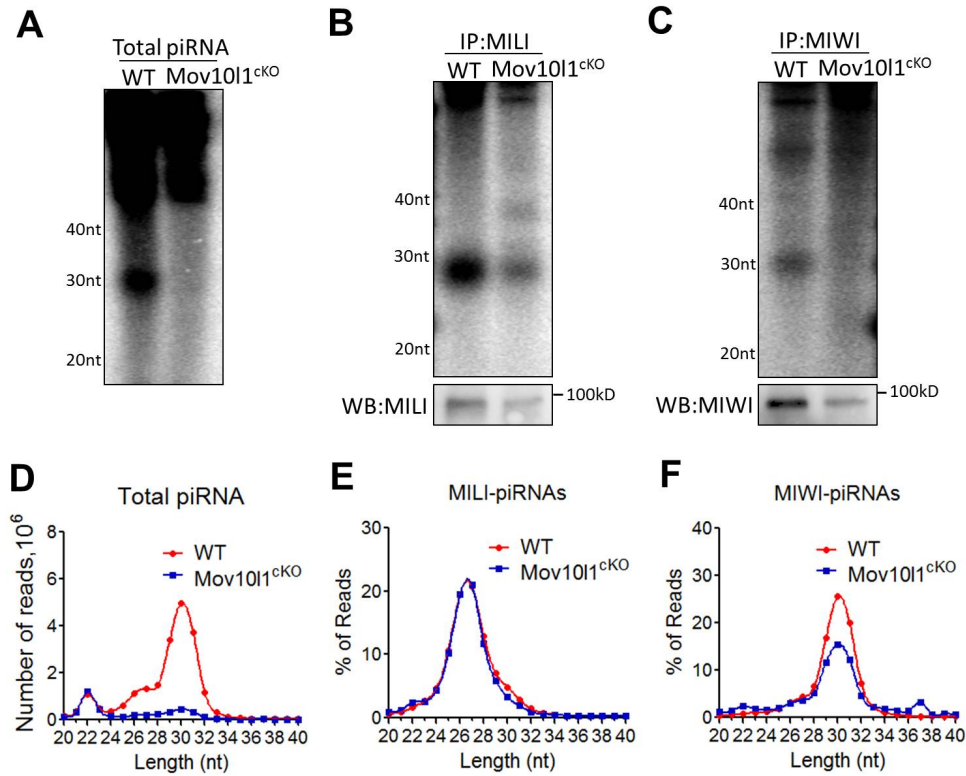

**Figure S4. MOV10L1 deficiency in postnatal germ cells causes pachytene piRNA defects in adult testes.**

(A) Reduction of total piRNA in *Mov10l1*<sup>CKO</sup> testes. Total RNAs from adult WT and *Mov10l1*<sup>CKO</sup> testes were end-labeled with [<sup>32</sup>P]-ATP and detected by 15% TBE urea gel and autoradiography.

(B) Reduction of MILI-piRNA in *Mov10l1*<sup>CKO</sup> testes. Small RNAs were isolated from immunoprecipitated MILI RNPs and were end-labeled with [<sup>32</sup>P]-ATP and detected by 15% TBE urea gel and autoradiography. Western blotting was performed with anti-MILI antibody to show immunoprecipitation efficiency.

(C) Diminished MIWI-piRNA in *Mov10l1*<sup>CKO</sup> testes. Small RNAs were isolated from immunoprecipitated MIWI RNPs and were end-labeled with [<sup>32</sup>P]-ATP and detected by 15% TBE urea gel and autoradiography. Western blotting was performed with anti-MIWI antibody to show immunoprecipitation efficiency.

(D) The length distribution of small RNAs from adult WT and *Mov10l1*<sup>CKO</sup> testicular small RNA libraries. Data were normalized by miRNA reads (21nt-23nt).

(E) The length distribution of MILI-piRNAs from adult WT and *Mov10l1*<sup>CKO</sup> MILI-piRNA libraries.

(F) The length distribution of MIWI-piRNAs from adult WT and *Mov10l1*<sup>CKO</sup> MIWI-piRNA libraries.

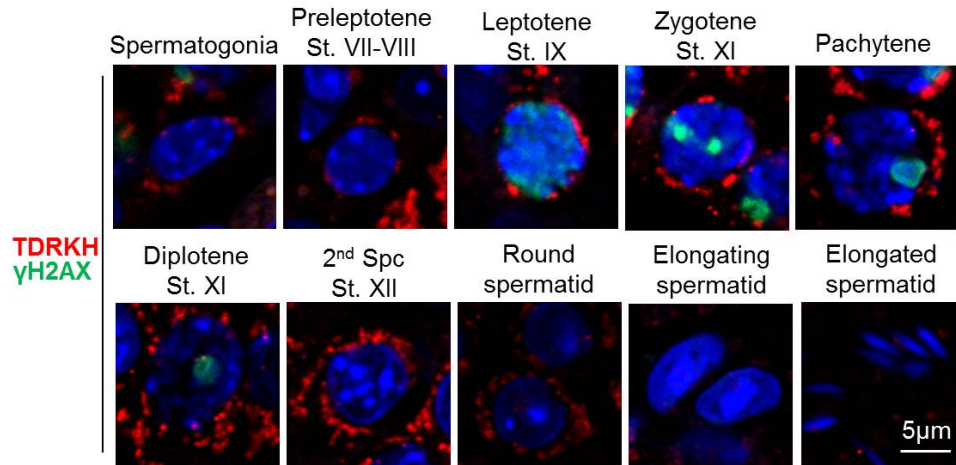

**Figure S5. TDRKH protein localization in the mouse testis.**

Co-immunostaining was performed using TDRKH and  $\gamma$ H2AX antibodies on adult WT testis sections. Different germ cell types were distinguished according to  $\gamma$ H2AX staining and DAPI staining. Scale bar, 5 $\mu$ m.

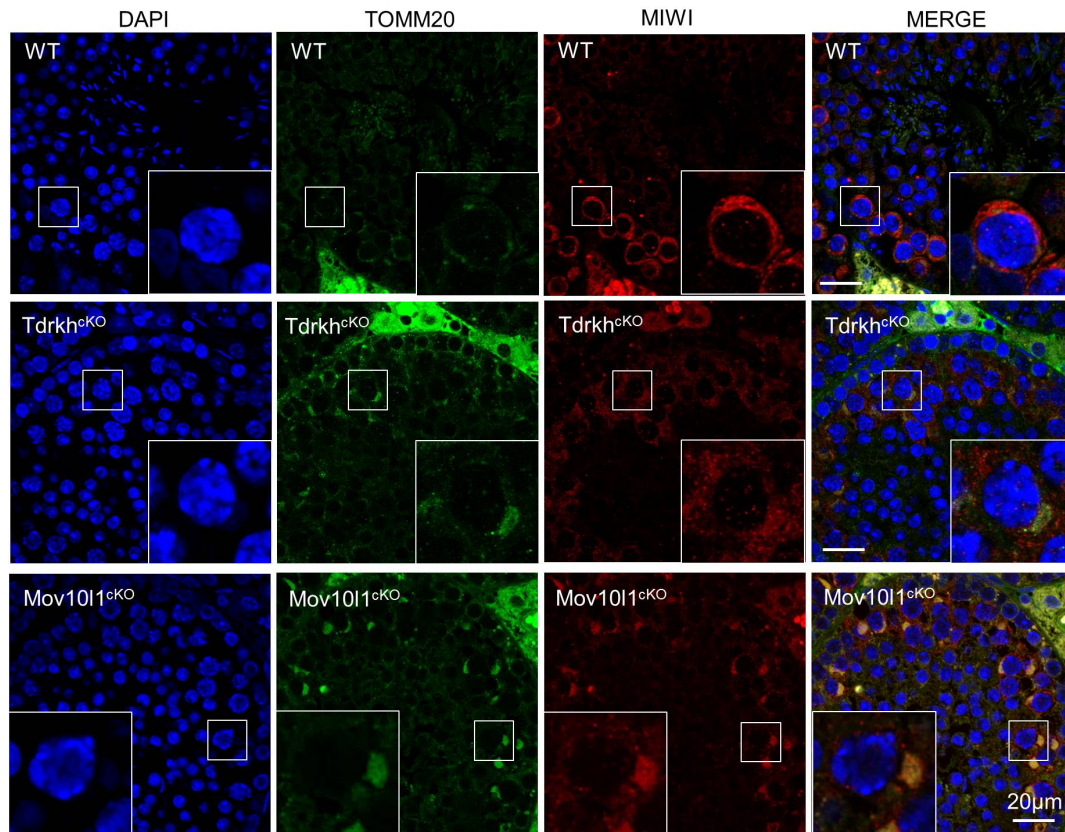

**Figure S6. TDRKH deficiency disrupts the localization of MIWI to mitochondria.**

Co-immunostaining was performed using MIWI and TOMM20 antibodies on adult WT, *Tdrkh*<sup>CKO</sup> and *Mov101*<sup>CKO</sup> testes. DNA was stained with DAPI. TOMM20 served as a mitochondrial marker. Scale bar, 20µm.

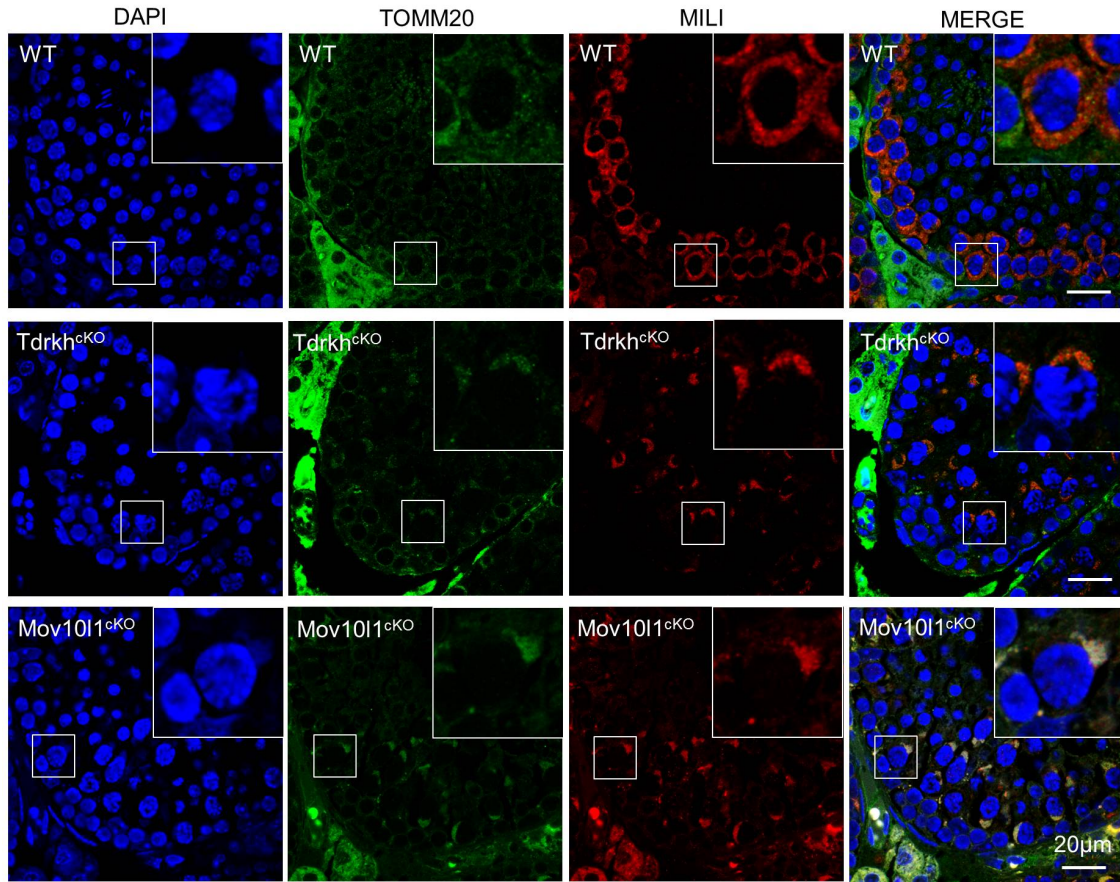

**Figure S7. The mitochondrial aggregation of MILI in *Tdrkh*<sup>cKO</sup> and *Mov10l1*<sup>cKO</sup> testes.**

Immunostaining was performed using MILI and TOMM20 antibodies on adult WT, *Tdrkh*<sup>cKO</sup> and *Mov10l1*<sup>cKO</sup> testes. DNA was stained with DAPI. TOMM20 served as a mitochondrial marker. Scale bar, 20μm.

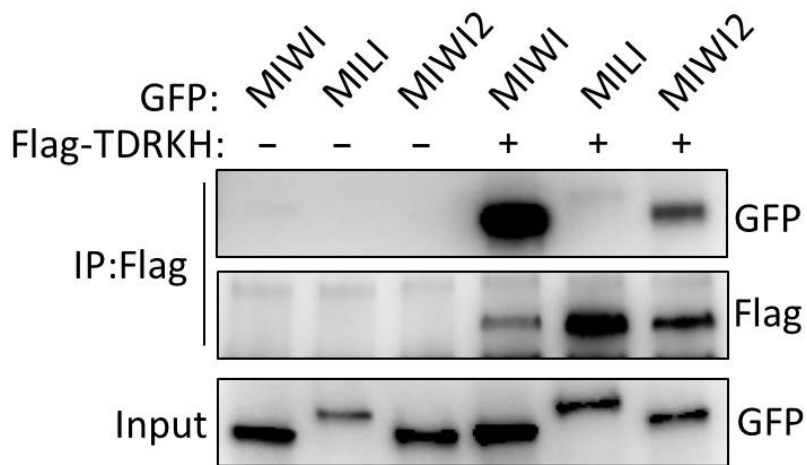

**Figure S8. TDRKH interacts with MIWI and MIWI2, but minimally with MILI.**

HEK293T cells were transfected with indicated plasmids. After 48 hours, immunoprecipitations were performed using anti-Flag resin. GFP-tagged proteins and Flag-TDRKH were detected with GFP and Flag antibodies by Western blotting.



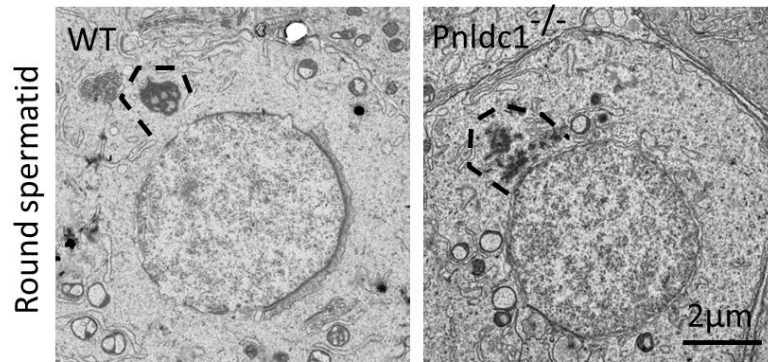

**Figure S9. PNLDC1 deficiency causes chromatoid body fragmentation.**

Transmission electron microscopy was performed on round spermatids from adult WT and *PnlDC1*<sup>-/-</sup> testes. The chromatoid bodies were indicated by dotted line. Scale bar, 2μm.

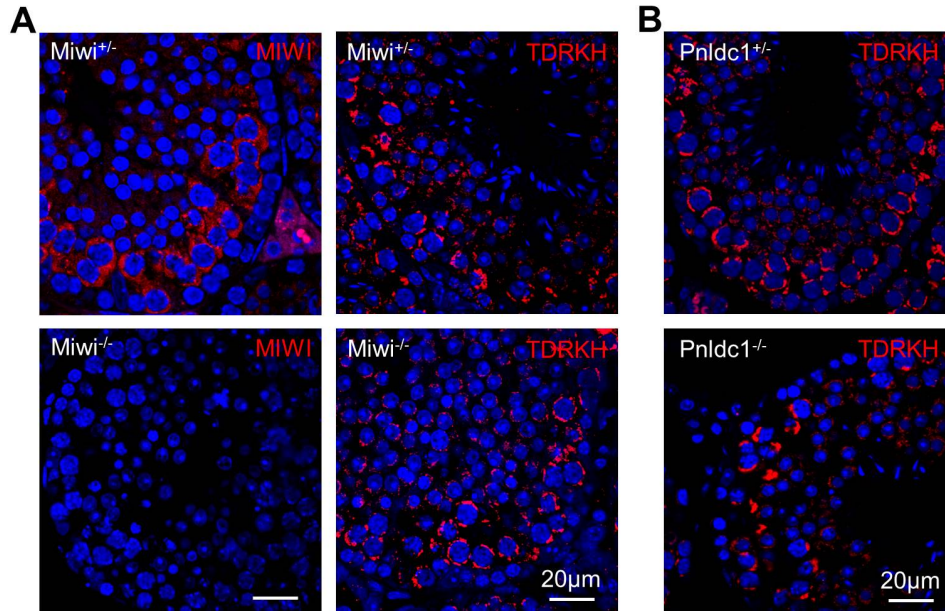

**Figure S10. TDRKH protein localization in *Pnlc1*<sup>-/-</sup> and *Miwi*<sup>-/-</sup> testes.**

**(A)** MIWI deficiency does not affect the localization of TDRKH. Immunostaining was performed using MIWI and TDRKH antibodies on adult *Miwi*<sup>+/-</sup> and *Miwi*<sup>-/-</sup> testes. DNA was stained with DAPI. Scale bar, 20µm.

**(B)** PNLDC1 deficiency does not affect TDRKH mitochondrial localization. Immunostaining was performed using TDRKH antibody on adult *Pnlc1*<sup>+/-</sup> and *Pnlc1*<sup>-/-</sup> testes. DNA was stained with DAPI. Scale bar, 20µm.

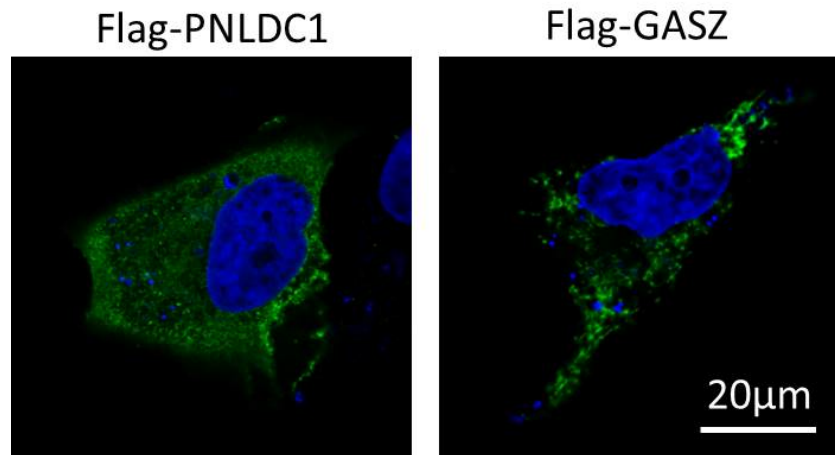

**Figure S11. Intracellular localization of PNLDC1 in HeLa cells.**

HeLa cells were transfected with indicated Flag-tagged plasmids. After 48 hours, the transfected cells were fixed and immunostained with Flag antibody. DNA was stained with DAPI. Scale bar, 20µm. GASZ served as a positive control for mitochondrial localization. PNLDC1 did not show typical mitochondrial localization pattern.

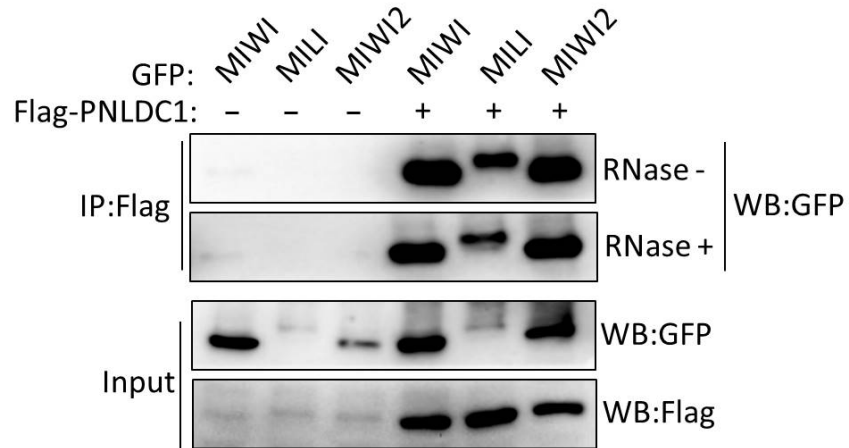

**Figure S12. PNLDC1 interacts with MIWI, MILI and MIWI2.**

HEK293T cells were transfected with indicated plasmids. After 48 hours, the cell lysates were treated with or without RNase A. Immunoprecipitations were performed using anti-Flag resin. GFP-tagged PIWI proteins and Flag-PNLDC1 were detected with GFP and Flag antibodies by Western blotting.

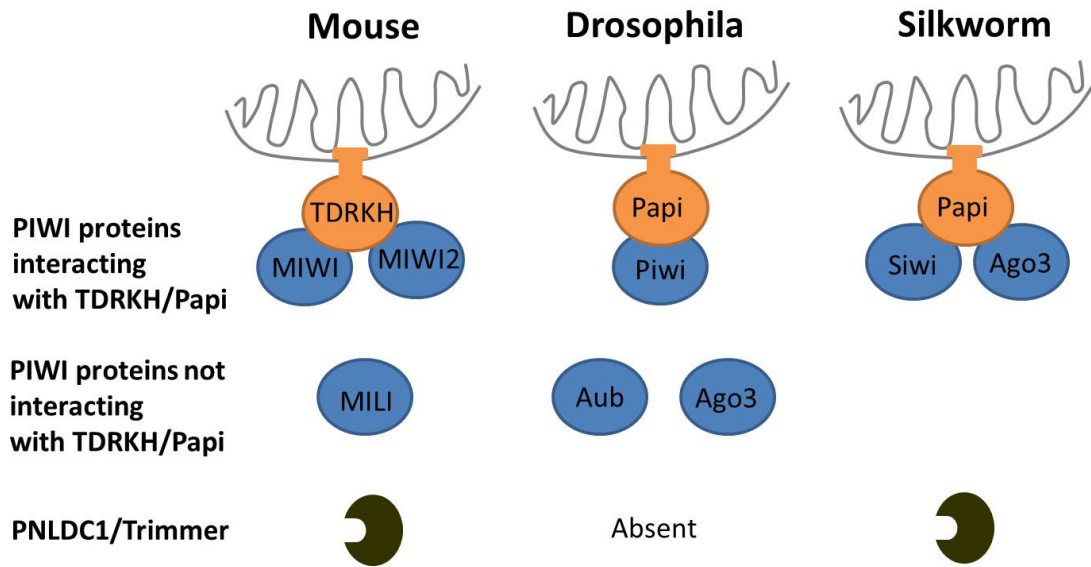

**Figure S13. Interaction relationship between TDRKH/Papi and PIWI proteins among different species.** PNLDC1 has conserved binding with mouse and silkworm TDRKH/papi. However, the PNLDC1 gene is absent in the *Drosophila* genome.
